# Supplementary material
Source: PubMed Central journal article supplement (PMC4301145)
Supplement: JVI.02570-14_zjv999099910so1.pdf [file JVI.02570-14_zjv999099910so1.pdf]

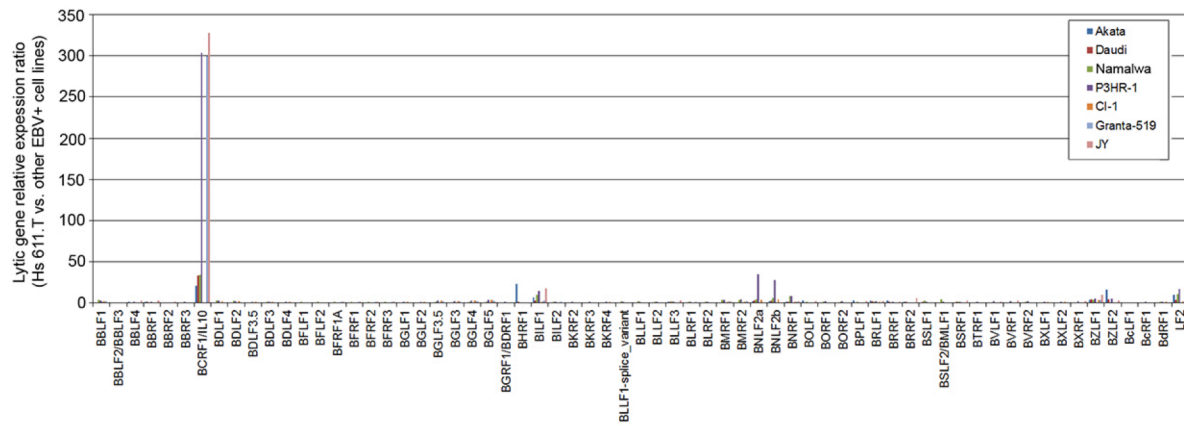

Supplemental figure 1. The FPKM ratio of EBV lytic genes in Hs 611.T to other analyzed EBV-positive cell lines shows a higher expression level of the BCRF1/vIL10 gene compared to the overall lytic expression level in the Hs 611.T cell line.
